# Supplementary material
Source: HighWire-hosted journal article supplement (https://jnm.snmjournals.org/highwire/filestream/94322/field_highwire_adjunct_files/0/97501_Supplemental_Data.pdf)
Supplement: 97501_Supplemental_Data.pdf [file 97501_Supplemental_Data.pdf]

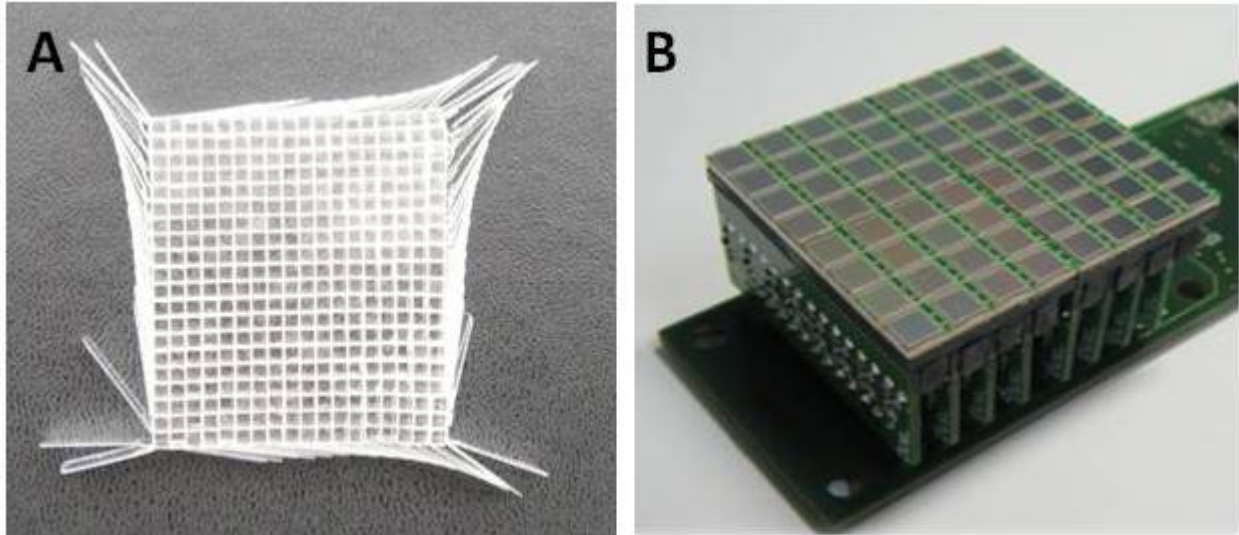

**SUPPL. FIGURE 1.** Scintillation crystal and silicon photomultiplier (SiPM). (A)  $20 \times 18$   $\text{Lu}_{1.9}\text{Gd}_{0.1}\text{SiO}_5\text{:Ce}$  (LGSO) crystal array. (B) Four multichannel SiPMs combined to yield  $8 \times 8$  channels.

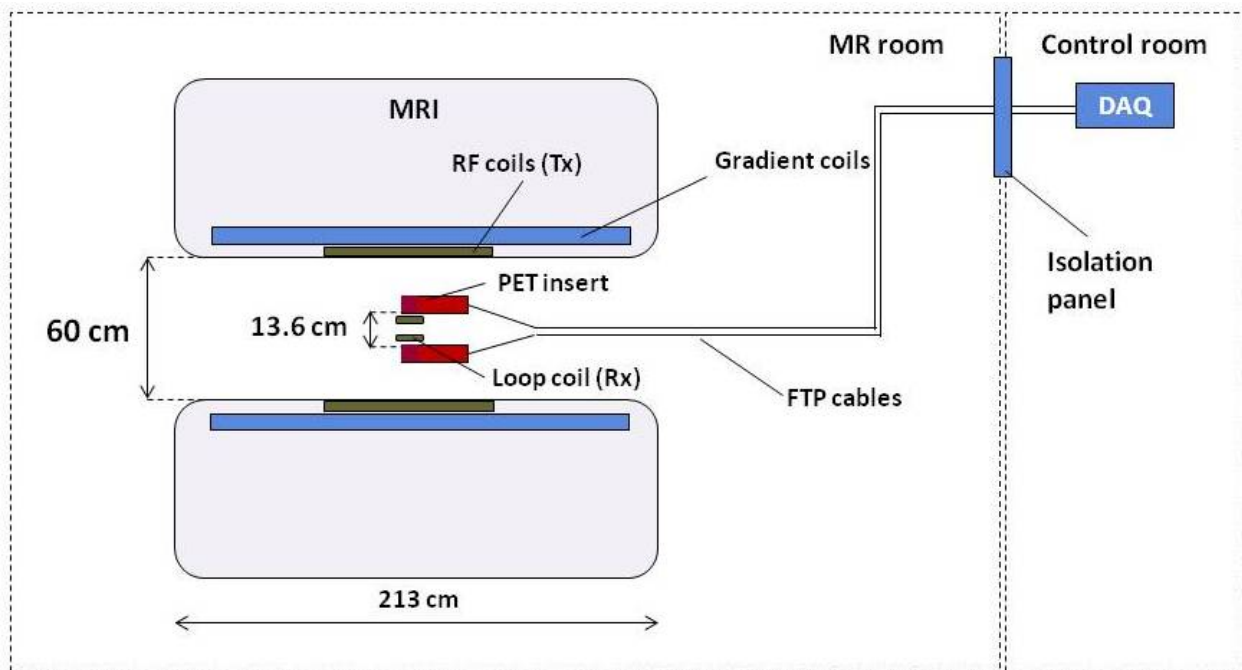

**SUPPL. FIGURE 2.** Experimental setup for simultaneous PET/MRI studies.

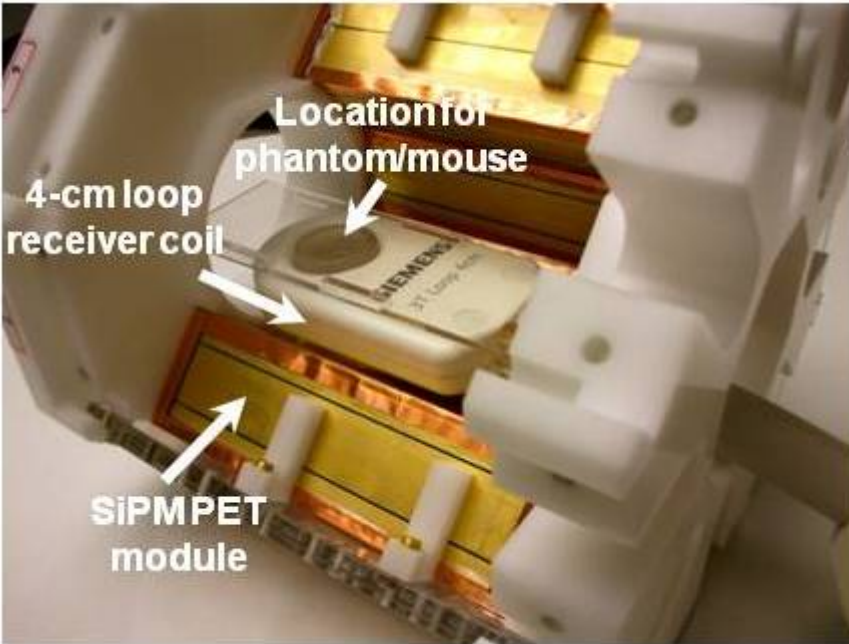

**SUPL. FIGURE 3.** Radiofrequency (RF) coil and coil holder placed inside the scanner.

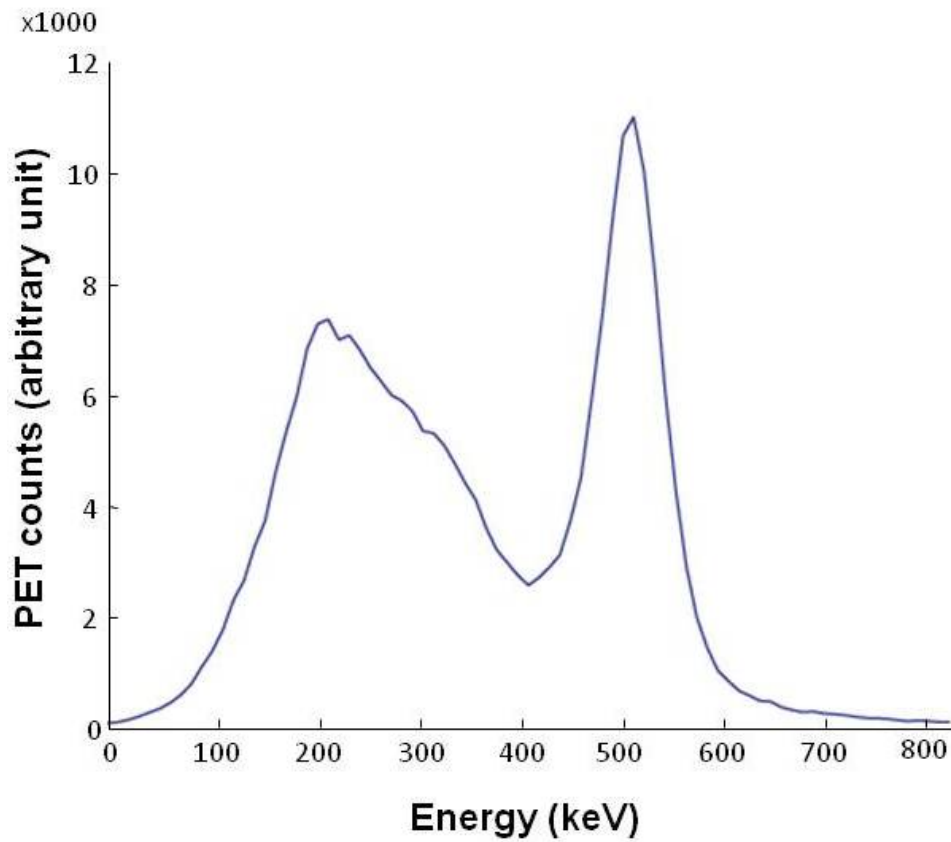

**SUPL. FIGURE 4.** Average energy spectrum of a block detector after peak alignment.

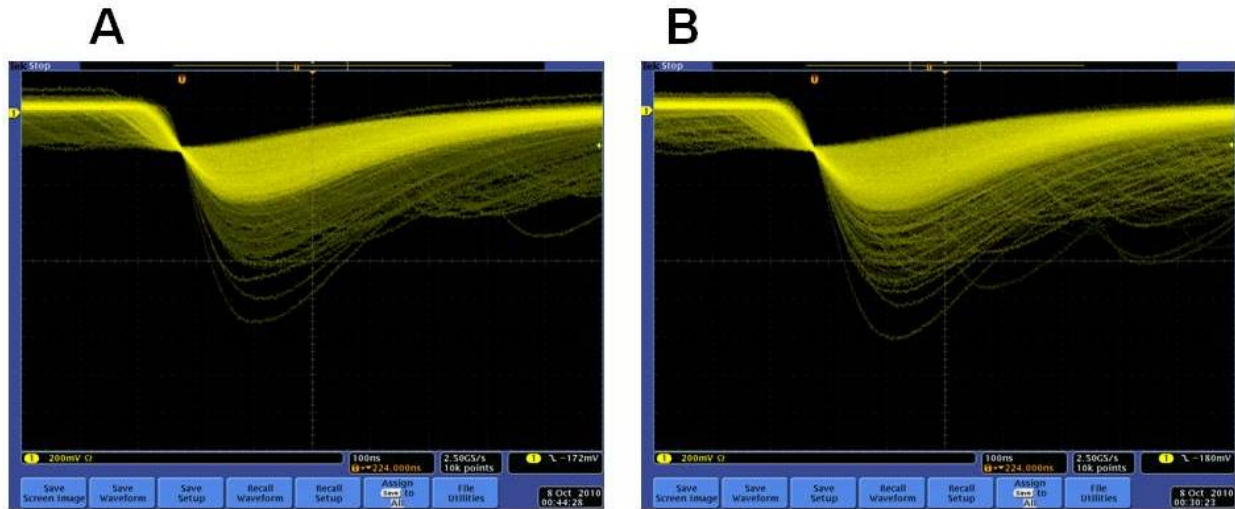

**SUPPL. FIGURE 5.** Raw SiPM PET signals acquired without (A) and with (B) application of RF pulse sequences.
